# Supplementary material
Source: publisher site journal article supplement (https://www.spandidos-publications.com/6100/downloadSupplementary)

Figure S1. Proposed flow diagram for the differential diagnoses of manganese and IPD, based on PET, SPECT and MRI neuro-imaging. This accompanies the material presented in Table I in the main manuscript. IPD, idiopathic Parkinson's disease; PET, positron emission tomography; SPECT, single-photon computed tomography; MRI, magnetic resonance imaging. The figure was adapted from the study by Kim (17). Please see the main text for references.

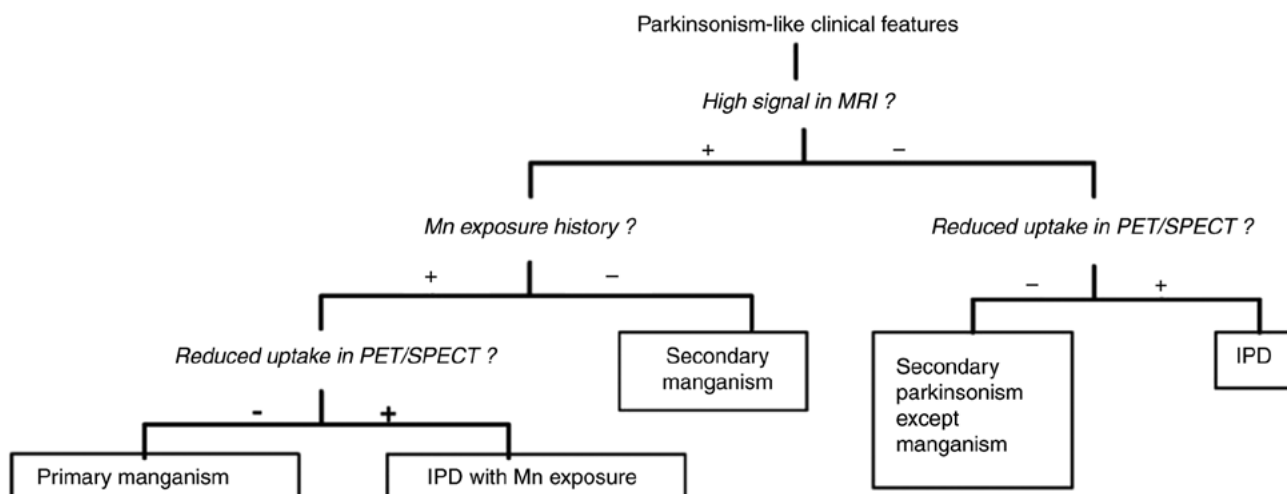

Supplement: Supplementary file [file downloadSupplementary]
